# Supplementary material for: Nitrogen-rich hierarchical porous carbon materials with interconnected channels for high stability supercapacitors
Source: Royal Society of Chemistry journal article supplement (doi:10.1039/c8nj05552a), 2018-12-19
Supplement: c8nj05552a1.pdf [file c8nj05552a1.pdf]

## Supporting Information

### **Nitrogen-rich hierarchical porous carbon materials with interconnected channels for high stability supercapacitors**

Zhenjie Sun,<sup>\*a</sup> Wenjie Wang,<sup>a</sup> Jiamin Zhang,<sup>a</sup> Guanchu Wang,<sup>a</sup> Kai Wang,<sup>a</sup> Xiaowei Liu,<sup>b</sup> Gang Ni<sup>c</sup> and Yang Jiang<sup>\*a</sup>

<sup>a</sup> *School of Materials Science and Engineering, HeFei University of Technology, Hefei 230009, P.R. China. E-mail: sunzhenjie@hfut.edu.cn (Z. J. Sun), apjiang@hfut.edu.cn (Y. Jiang)*

<sup>b</sup> *School of Resources and Environmental Engineering, HeFei University of Technology, Hefei 230009, P.R. China.*

<sup>c</sup> *School of Chemistry and Chemical Engineering, HeFei University of Technology, Hefei 230009, P.R. China.*

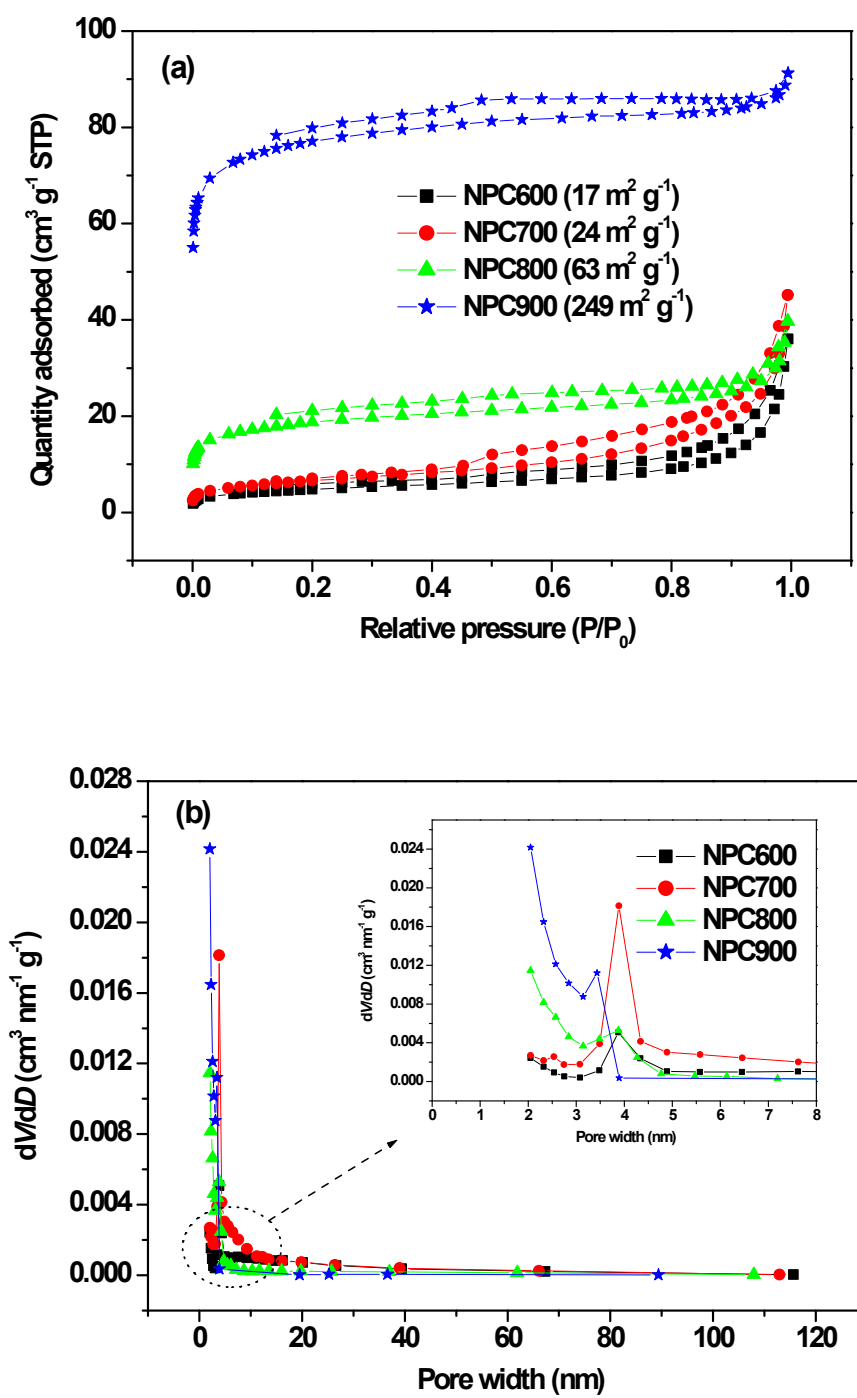

Fig. S1 (a) Nitrogen adsorption–desorption isotherms and (b) pore-size distribution curves of NPC600, NPC700, NPC800 and NPC900.

**Table S1** Characteristic of pores in NPC600, NPC700, NPC800 and NPC900

| Sample | $S_{\text{BET}}$<br>( $\text{m}^2\text{g}^{-1}$ ) | $S_{\text{micro}}$<br>( $\text{m}^2\text{g}^{-1}$ ) | $S_{\text{external}}$<br>( $\text{m}^2\text{g}^{-1}$ ) | $V_{\text{total}}$<br>( $\text{cm}^3\text{g}^{-1}$ ) | $V_{\text{micro}}$<br>( $\text{cm}^3\text{g}^{-1}$ ) | average pore<br>diameter (nm) |
|--------|---------------------------------------------------|-----------------------------------------------------|--------------------------------------------------------|------------------------------------------------------|------------------------------------------------------|-------------------------------|
| NPC600 | 17                                                | 2                                                   | 15                                                     | 0.0259                                               | 0.0009                                               | 6.08                          |
| NPC700 | 24                                                | 2                                                   | 22                                                     | 0.0384                                               | 0.0007                                               | 6.52                          |
| NPC800 | 63                                                | 29                                                  | 34                                                     | 0.0423                                               | 0.0143                                               | 2.69                          |
| NPC900 | 249                                               | 188                                                 | 61                                                     | 0.1313                                               | 0.0923                                               | 2.11                          |
